# Supplementary material
Source: PubMed Central journal article supplement (PMC3986139)
Supplement: 1308663111_pnas.201308663SI.pdf [file 1308663111_pnas.201308663SI.pdf]

# Supporting Information

Daugherty et al. 10.1073/pnas.1308663111

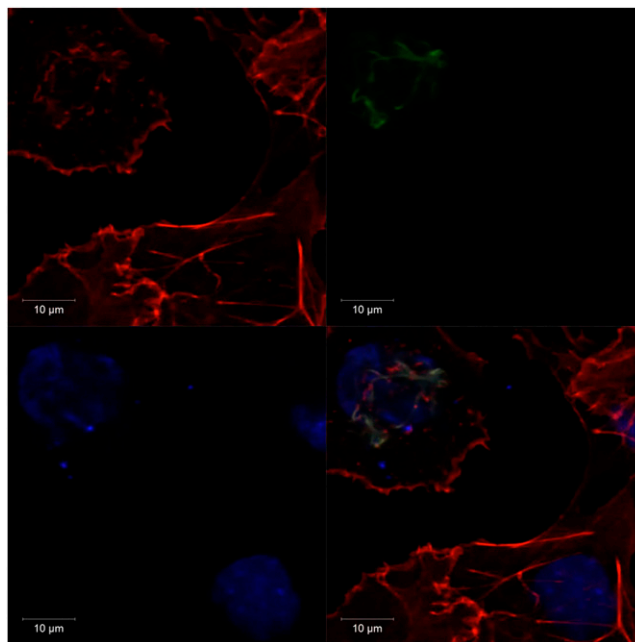

**Movie S1.** Z stacks of images were obtained in 1- $\mu\text{m}$  sections using a Zeiss LSM 710 confocal microscope with a 63 $\times$ /1.46 N.A. oil alpha Plan Apochromat objective. COS7 were transfected with the Myc nuclear localization signal  $\alpha$ -catenin ( $\alpha$ -cat) construct for 48 h and prepared as described in [SI Appendix](#). Cells were stained with rhodamine phalloidin (Invitrogen) to label actin filaments (red), FITC anti-myc antibody (Sigma) to label  $\alpha$ -cat (green), and mounting media containing DAPI (Vectashield) to label DNA (blue). Image processing was done using Zeiss Zen software.

[Movie S1](#)

## Other Supporting Information Files

[SI Appendix \(PDF\)](#)
